# Supplementary material for: Classification of target tissues of Eisenia fetida using sequential multimodal chemical analysis and machine learning
Source: PubMed Central journal article supplement (PMC8847259; doi:10.1007/s00418-021-02037-1), 2021-11-08
Supplement: 418_2021_2037_MOESM1_ESM.pdf [file 418_2021_2037_MOESM1_ESM.pdf]

Supplemental Material to the Manuscript

## **Sequential analysis of *Eisenia fetida* tissue sections: Classification of target tissue using multimodal chemical analysis and machine learning**

Sven Ritschar<sup>1‡</sup>, Elisabeth Schirmer<sup>2‡</sup>, Benedikt Hufnagel<sup>3,4</sup>, Martin G. J. Löder<sup>1</sup>, Andreas Römpf<sup>2\*</sup> and Christian Laforsch<sup>1\*</sup>

<sup>1</sup>Department of Animal Ecology I and BayCEER, University of Bayreuth, Germany

<sup>2</sup>Department of Bioanalytical Sciences and Food analysis, University of Bayreuth, Germany

<sup>3</sup>Institute of Chemical Technologies and Analytics, TU Vienna, Austria

<sup>4</sup>Purency GmbH, Walfischgasse 8/34, AT-1010 Vienna, Austria

‡contributed equally to this work

Corresponding author\*:

Christian Laforsch, [Christian.Laforsch@uni-bayreuth.de](mailto:Christian.Laforsch@uni-bayreuth.de)

Andreas Römpf, [Andreas.Roempp@uni-bayreuth.de](mailto:Andreas.Roempp@uni-bayreuth.de)

**Table S1:** Results of the Monte-Carlo cross validation, calculated for each class and overall classification performance measures of the model based on random decision forest classification.

| <b>CLASS</b> | <b>1 (BACKGROUND)</b> | <b>2 (MUSCLE TISSUE)</b> | <b>3 (DIGESTIVE TISSUE)</b> | <b>4 (OTHER TISSUE)</b> |
|--------------|-----------------------|--------------------------|-----------------------------|-------------------------|
| SENSITIVITY  | 1                     | 0.9833                   | 0.9167                      | 0.8167                  |
| SPECIFICITY  | 0.9956                | 0.9678                   | 0.9622                      | 0.9800                  |
| PRECISION    | 0.9868                | 0.9105                   | 0.8900                      | 0.9316                  |

**OVERALL CLASSIFICATION PERFORMANCE MEASURES**

|                |        |
|----------------|--------|
| TOTAL ACCURACY | 0.9292 |
| COHEN'S KAPPA  | 0.9056 |
| EMCC           | 0.9064 |

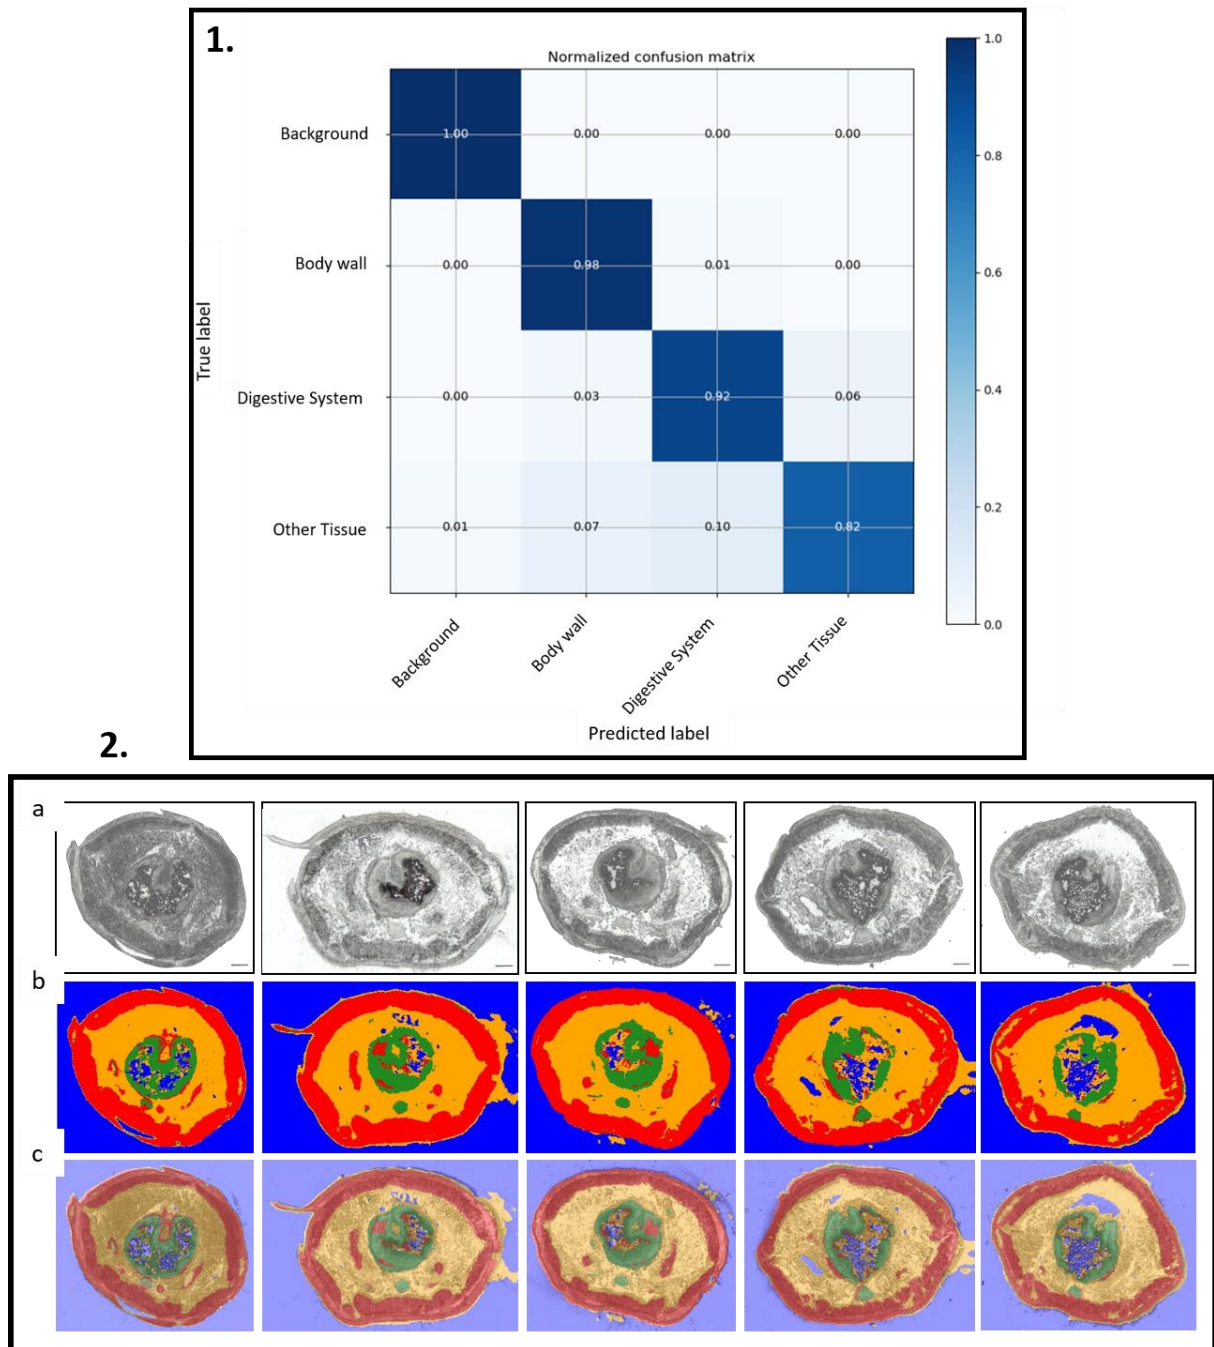

**Figure S1:** Results of the cross-validation of the RDF by Monte-Carlo- Cross validation and replication of the application of the RDF model on five individual tissue sections of *E. fetida*. **1.** Confusion matrix, the entries of the main diagonal represent the correctly classified cases whereas the off-diagonal elements are the wrongly classified cases. **2. a:** optical image of the respective thin-section of *E. fetida*. **b:** Result of the application of the RDF on the FTIR-hyperspectral images of the respective section of *E. fetida*, the classes have been assigned their specific color (blue=" Background", red=" Muscle", green=" Digestive system" and orange=" Other tissue"). **c:** Overlay of the results of the RDF (b) and the optical images (a). Scale bar= 250 μm.

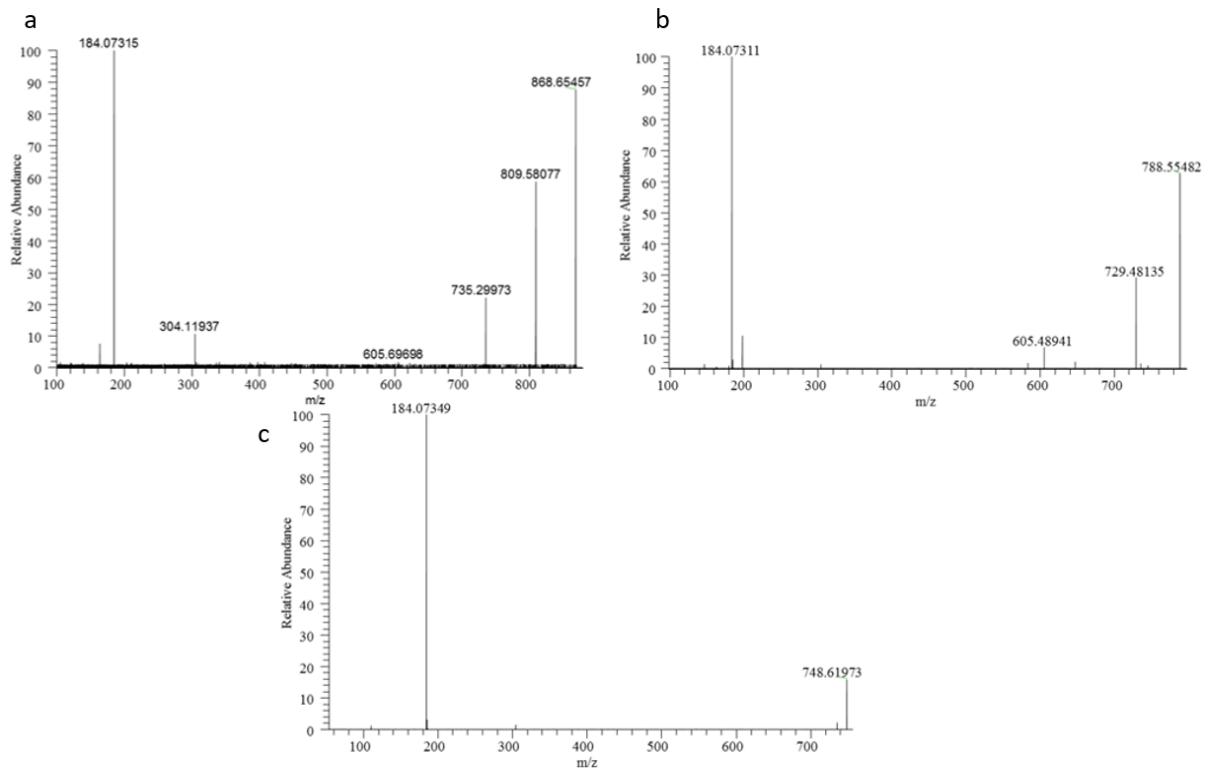

**Figure S2:** MS/MS of the tentatively identified lipids in cross sections of *E. fetida*. **a:** Lipid 1, PC (O-40:1)  $[M+K]^+$  (m/z 868.6556; RMSE: 1.2810 ppm, 1103 spectra) identified in the epidermis of the cross section of *E. fetida*; **b:** Lipid 2, PC (O-36:5)  $[M+Na]^+$  (m/z 788.5565; RMSE: 0.6530 ppm, 30824 spectra), identified in the digestive system of *E. fetida*; **c:** Lipid 3, PC (O-34:0)  $[M+H]^+$  (m/z 748.6215; RMSE 0.5396 ppm, 55232 spectra) identified in the coelom of *E. fetida*.

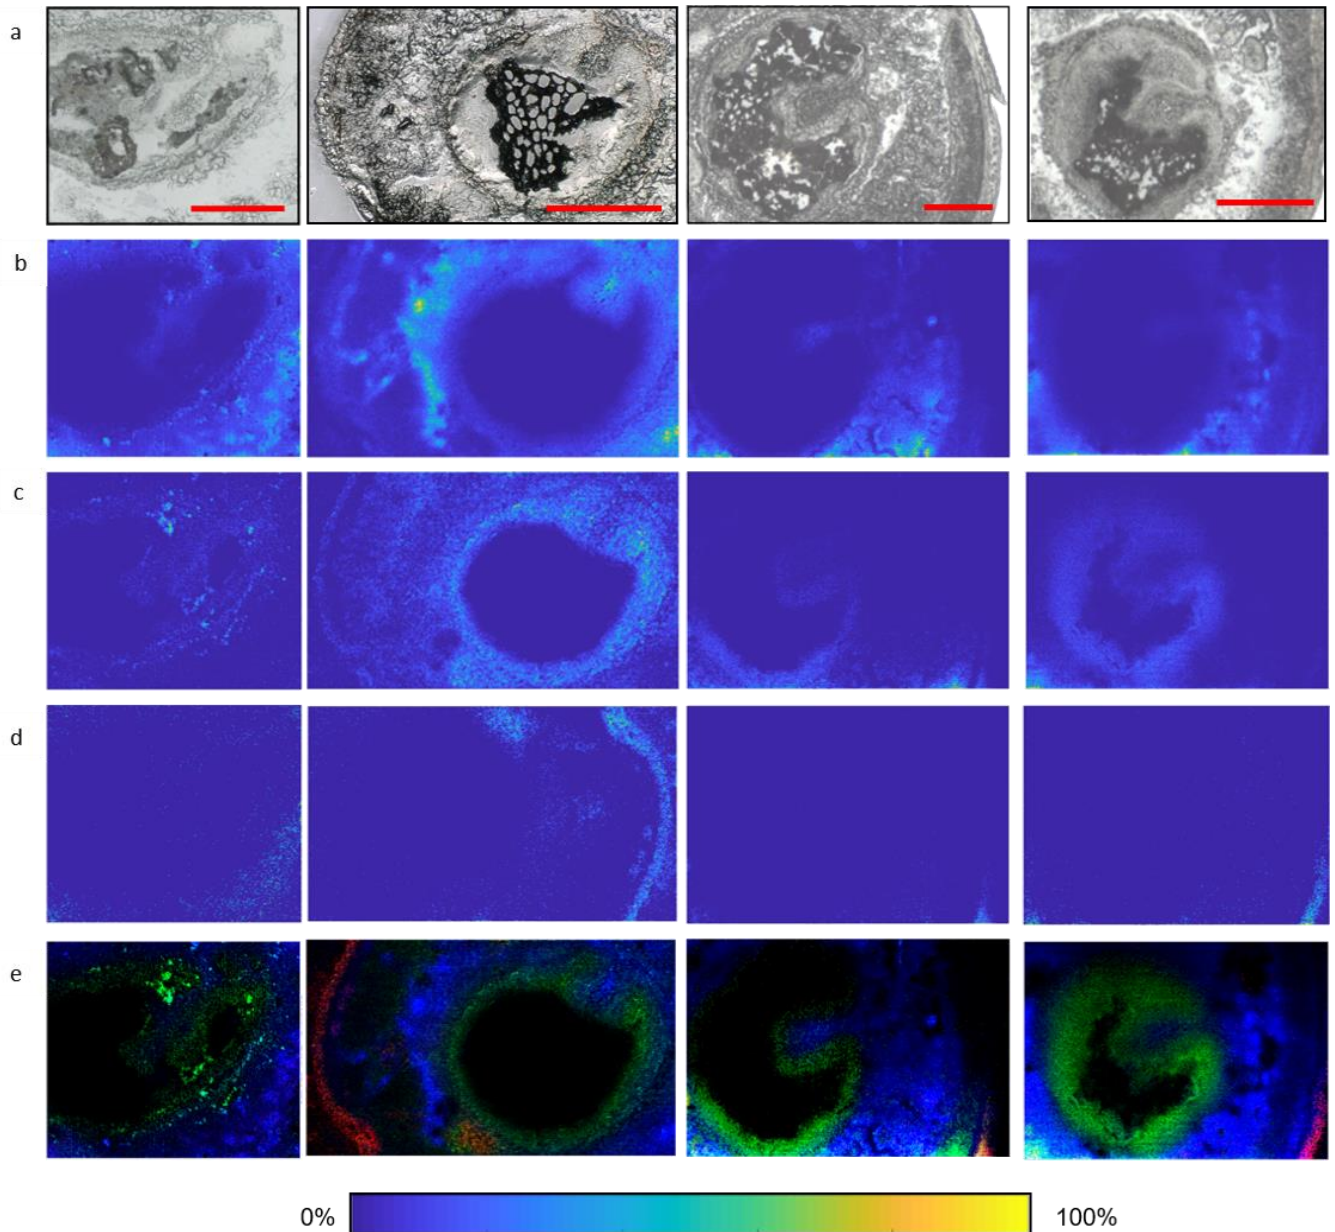

**Figure S3:** Replication of the MALDI-MSI data evaluation on four individual tissue sections of *E. fetida*. **a:** optical image of the areas selected for MALDI-MSI measurements. **b:** Distribution of PC (O-34:0) [M+H]<sup>+</sup> (m/z= 748.62120). **c:** Distribution of the tentatively identified lipid PC (O-36:5) [M+Na]<sup>+</sup> (m/z= 788.55660). **d:** Distribution of the tentatively identified lipid PC (O-40:1) [M+K]<sup>+</sup> (m/z= 868.65515). **e:** RGB overlay of the three identified lipids with their respective colors (b= blue, c= green and d= red). Scale bar= 500μm.
